# Supplementary material for: Persistent effects of early-life arsenic exposure in Caenorhabditis elegans
Source: Royal Society of Chemistry journal article supplement (doi:10.1039/d5em00655d), 2026-01-01
Supplement: d5em00655d1.xlsx [file d5em00655d1.xlsx]

## Sheet: Expression
	Metabolite	Formula	Ion Type	mz	ppm	RT	RT_range	Detection	Skeleton_Metabolite	Sample Count	0% R1-0	0% R1-0/worm	10% R1-0	10% R1-0/worm	100% R1-0	100% R1-0/worm	0% R2-0	0% R2-0/worm	10% R2-0	10% R2-0/worm	100% R2-0	100% R2-0/worm	0% R3-0	0% R3-0/worm	10% R3-0	10% R3-0/worm	100% R3-0	100% R3-0/worm	0% R4-0	0% R4-0/worm	10% R4-0	10% R4-0/worm	100% R4-0	100% R4-0/worm	0% R1-8	0% R1-8/worm	10% R1-8	10% R1-8/worm	100% R1-8	100% R1-8/worm	0% R2-8	0% R2-8/worm	10% R2-8	10% R2-8/worm	100% R2-8	100% R2-8/worm	0% R3-8	0% R3-8/worm	10% R3-8
5	6 4-Hydroxyproline	C5H9NO3	[M+H]+	132.065	0.6	10.88	0.1	24	4-Hydroxyproline	24	265302	265.302	325584	295.985	315529	332.136	331359	245.451	194429	185.17	393499	403.589	280277	301.373	330273	330.273	310962	215.946	723975	709.779	288487	235.5	185350	162.588	2071225	2239.16	4767324	5238.82	4057907	4590.39	1317262	1463.62	1995237	2608.15	4839505	3163.08	2663608	2959.56	2378129
4	5 4,5-Dihydroorotic acid	C5H6N2O4	[M-H]-	157.025	-7.5	8.63	0.29	24	4,5-Dihydroorotic acid	24	162975	162.975	413420	375.836	47495	49.9947	466547	345.59	249676	237.787	44795	45.9436	30943	33.272	286839	286.839	41895	29.0938	553945	543.083	270387	220.724	41556	36.4526	2048622	2214.73	220612	242.431	2708683	3064.12	618485	687.206	1930452	2523.47	2690138	1758.26	2157981	2397.76	2890453
6	7 5'-Methylthioadenosine	C11H15N5O3S	[M+H]+	298.097	-0.8	4.35	0.36	24	5'-Methylthioadenosine	24	157804	157.804	655813	596.194	405966	427.333	799988	592.584	209710	199.724	514346	527.534	706802	760.002	504628	504.628	598167	415.394	818664	802.612	461125	376.429	551973	484.187	3794246	4101.89	841620	924.857	3301091	3734.27	1386300	1540.33	1995253	2608.17	2857570	1867.69	2501448	2779.39	2767902
12	13 Adenine	C5H5N5	[M+H]+	136.062	0.9	6.44	0.13	24	Adenine	24	10161370	10161.4	7980546	7255.04	10120129	10652.8	8793870	6513.98	7196376	6853.69	10571806	10842.9	6866345	7383.17	13659543	13659.5	9888012	6866.68	6152294	6031.66	8474366	6917.85	12314836	10802.5	13092126	14153.6	5584210	6136.49	21219212	24003.6	9652954	10725.5	10611435	13871.2	9892873	6465.93	10286779	11429.8	12904955
15	16 Adenosine monophosphate	C10H14N5O7P	[M+H]+	348.07	-0.8	10.98	0.08	24	Adenosine monophosphate	24	2594582	2594.58	7444599	6767.82	9173928	9656.77	16325711	12093.1	7942020	7563.83	19708500	20213.8	4512936	4852.62	14165743	14165.7	14354592	9968.47	16659095	16332.4	11545353	9424.78	10158245	8910.74	18347392	19835	2504871	2752.61	12688914	14354	14653421	16281.6	14017905	18324.1	31153454	20361.7	15424518	17138.4	18784472
19	20 Allantoin	C4H6N4O3	[M-H]-	157.037	-7.7	10.43	0.07	24	Allantoin	24	263330	263.33	717440	652.218	198014	208.436	3427794	2539.11	388916	370.396	413748	424.357	2154216	2316.36	502681	502.681	249532	173.286	8819818	8646.88	1369207	1117.72	794696	697.102	7838414	8473.96	5742196	6310.11	6240888	7059.83	9872584	10969.5	8685570	11353.7	9443548	6172.25	7616947	8463.27	7063968
20	21 Aminoadipic acid	C6H11NO4	[M-H]-	160.061	-7.1	7.11	0.34	24	Aminoadipic acid	24	43458	43.458	206483	187.712	120480	126.821	382822	283.572	159237	151.654	331697	340.202	186312	200.335	314316	314.316	144670	100.465	375272	367.914	217202	177.308	137015	120.189	710752	768.381	543451	597.199	413505	467.766	372326	413.696	415730	543.438	704194	460.258	605373	672.637	320273
23	24 Betaine	C5H11NO2	[M+H]+	118.086	1.2	7.98	0.1	24	Betaine	24	68192744	68192.7	157490144	143173	137068352	144282	170957536	126635	107376144	102263	235604592	241646	234638656	252300	246876448	246876	195875152	136024	200531440	196599	170676800	139328	152592336	133853	1237486208	1.33782e+06	1276504704	1.40275e+06	1235691264	1.39784e+06	808264704	898072	927001408	1.21177e+06	1296602112	847452	1216981120	1.3522e+06	1143220992
24	25 Butyrylcarnitine	C11H21NO4	[M+H]+	232.154	-1	5.85	0.44	24	Butyrylcarnitine	24	49630	49.63	384188	349.262	137177	144.397	459196	340.145	190353	181.289	289204	296.619	242038	260.256	383587	383.587	105320	73.1389	510863	500.846	272089	222.113	84586	74.1982	8757721	9467.81	8992059	9881.38	5519831	6244.15	7025948	7806.61	5528475	7226.76	7093794	4636.47	11118493	12353.9	7013178
28	29 Choline	C5H14NO	[Cat]+	104.107	3	14.13	0.16	24	Choline	24	46860992	46861	76038584	69126	81086920	85354.7	108106544	80078.9	54649008	52046.7	159606864	163699	78479824	84386.9	93753416	93753.4	94512752	65633.9	123666728	121242	94569048	77199.2	98762400	86633.7	269392416	291235	449082208	493497	359029632	406142	169057728	187842	171482288	224160	272013248	177786	276255488	306951	207330176
31	32 Citrulline	C6H13N3O3	[M+H]+	176.103	0.2	12.24	0.08	24	Citrulline	24	1017100	1017.1	4307038	3915.49	5572716	5866.02	4753972	3521.46	3838232	3655.46	10732813	11008	2204862	2370.82	4653531	4653.53	4113484	2856.59	2571905	2521.48	3862123	3152.75	4795214	4206.33	990624	1070.94	1150549	1264.34	12878235	14568.1	352995	392.217	775979	1014.35	1579586	1032.41	754916	838.796	952918
35	36 Cytidine	C9H13N3O5	[M+H]+	244.093	-0.8	8.58	0.31	24	Cytidine	24	1004663	1004.66	1987852	1807.14	2273644	2393.31	3332892	2468.81	1456877	1387.5	1416973	1453.31	4331310	4657.32	1554437	1554.44	1337879	929.083	2192934	2149.94	1839677	1501.78	2425817	2127.91	3721649	4023.4	5786748	6359.06	6423178	7266.04	4300128	4777.92	4926396	6439.73	6012122	3929.49	4342587	4825.1	5415986
39	40 D-2-Hydroxyglutaric acid	C5H8O5	[M-H]-	147.03	-8.2	12.53	0.09	24	D-2-Hydroxyglutaric acid	24	2843734	2843.73	11617741	10561.6	6054190	6372.83	14198384	10517.3	8370309	7971.72	12491582	12811.9	13161508	14152.2	16501093	16501.1	9208893	6395.06	14096617	13820.2	10515326	8583.94	4981408	4369.66	7424958	8026.98	5712020	6276.95	5320226	6018.36	4274226	4749.14	4573409	5978.31	11043133	7217.73	6435952	7151.06	8762948
40	41 D-Glucose	C6H12O6	[M-H]-	179.056	-5.7	11.03	0.25	24	D-Glucose	24	54828	54.828	54775	49.7955	54600	57.4737	100875	74.7222	53625	51.0714	83569	85.7118	134872	145.024	60123	60.123	60630	42.1042	134851	132.207	85417	69.7282	64389	56.4816	917832	992.251	2222928	2442.78	828330	937.025	532143	591.27	617151	806.733	845070	552.333	1071274	1190.3	656151
55	56 Glycine	C2H5NO2	[M+H]+	76.0393	7.8	11.99	0.06	24	Glycine	24	1608044	1608.04	2890198	2627.45	3527056	3712.69	2626520	1945.57	2141753	2039.76	5218454	5352.26	2286247	2458.33	3125455	3125.45	3734275	2593.25	4080806	4000.79	3184574	2599.65	3548475	3112.7	9887290	10689	11104104	12202.3	10248273	11593.1	6867378	7630.42	8170528	10680.4	13204087	8630.12	7671599	8524	8882731
57	58 Guanine	C5H5N5O	[M+H]+	152.057	0.1	8.82	0.1	24	Guanine	24	5465026	5465.03	14807345	13461.2	13863839	14593.5	15578087	11539.3	9005508	8576.67	20158038	20674.9	9805169	10543.2	17848436	17848.4	15689934	10895.8	9983555	9787.8	11123906	9080.74	11843680	10389.2	19010096	20551.5	30499860	33516.3	17902240	20251.4	7598958	8443.29	7519512	9829.43	15561685	10171	18226690	20251.9	12193871
58	59 Guanosine	C10H13N5O5	[M+H]+	284.099	-0.5	9.11	0.11	24	Guanosine	24	1921400	1921.4	4168098	3789.18	6540359	6884.59	10000242	7407.59	3665581	3491.03	7939186	8142.75	12785196	13747.5	4919698	4919.7	6197730	4303.98	6298806	6175.3	5347078	4364.96	6526830	5725.29	34227960	37003.2	35157932	38635.1	27230200	30803.4	18295172	20328	17403256	22749.4	22238564	14535	28232904	31369.9	23393182
63	64 Hypotaurine	C2H7NO2S	[M+H]+	110.027	5.2	11.39	0.17	24	Hypotaurine	24	35447	35.447	59476	54.0691	29629	31.1884	141499	104.814	33300	31.7143	57459	58.9323	111425	119.812	72508	72.508	40037	27.8035	67910	66.5784	61465	50.1755	27211	23.8693	155470	168.076	140660	154.571	87018	98.4367	46035	51.15	52330	68.4052	119047	77.8085	135897	150.997	105863
64	65 Hypoxanthine	C5H4N4O	[M+H]+	137.046	0.1	7.2	0.31	24	Hypoxanthine	24	8760528	8760.53	5905932	5369.03	18252696	19213.4	30158984	22340	7414810	7061.72	36640580	37580.1	49193100	52895.8	13840090	13840.1	13863603	9627.5	41803960	40984.3	27802416	22695.8	28183476	24722.3	67875448	73378.9	189007104	207700	83607128	94578.2	28755670	31950.7	36236784	47368.3	68875424	45016.6	74507176	82785.8	50108456
65	66 Inosine	C10H12N4O5	[M+H]+	269.088	-1.3	7.85	0.15	24	Inosine	24	6100883	6100.88	8004255	7276.6	12155329	12795.1	11871580	8793.76	4912984	4679.03	12705567	13031.4	30526306	32824	8822646	8822.65	7783165	5404.98	12365347	12122.9	10888532	8888.6	13726307	12040.6	61635912	66633.4	91598608	100658	56218728	63595.8	35521752	39468.6	40598476	53069.9	30938938	20221.5	57392144	63769	49488232
67	68 L-Acetylcarnitine	C9H17NO4	[M+H]+	204.123	-1.6	7.72	0.37	24	L-Acetylcarnitine	24	757273	757.273	5438155	4943.78	3760967	3958.91	6196132	4589.73	4462632	4250.13	6851450	7027.13	4156848	4469.73	5736246	5736.25	2688048	1866.7	7629915	7480.31	4698250	3835.31	2735186	2399.29	80969024	87534.1	68763848	75564.7	64463916	72923	40121800	44579.8	40958816	53540.9	44960896	29386.2	63140340	70155.9	56488848
68	69 L-Alanine	C3H7NO2	[M+H]+	90.055	6	11.07	0.08	24	L-Alanine	24	40419856	40419.9	63872812	58066.2	60205488	63374.2	93992488	69624.1	56412432	53726.1	90078008	92387.7	82419976	88623.6	84802744	84802.7	69925040	48559.1	103292496	101267	76480880	62433.4	61748332	54165.2	224416832	242613	184832848	203113	180175824	203819	173462416	192736	172700240	225752	228789744	149536	208071472	231191	202721488
71	72 L-Aspartic acid	C4H7NO4	[M-H]-	132.03	-9.3	12.06	0.06	24	L-Aspartic acid	24	9141948	9141.95	12753066	11593.7	14677575	15450.1	12861745	9527.22	6718658	6398.72	17137840	17577.3	13252215	14249.7	10822742	10822.7	12715628	8830.3	16211693	15893.8	11439139	9338.07	12215153	10715	36718560	39695.7	43871280	48210.2	38025508	43015.3	28734254	31926.9	30954872	40463.9	40500196	26470.7	39474724	43860.8	35381036
72	73 L-Carnitine	C7H16NO3	[Cat]+	162.113	-1.1	9.77	0.13	24	L-Carnitine	24	4249772	4249.77	7118110	6471.01	7886390	8301.46	10039154	7436.41	4133167	3936.35	16232060	16648.3	7948801	8547.1	9159495	9159.5	10523702	7308.13	9815224	9622.77	7889234	6440.19	10682042	9370.21	105625080	114189	114731568	126079	106944256	120978	70813528	78681.7	68187456	89133.9	145704368	95231.6	80246416	89162.7	92161456
73	74 L-Cystathionine	C7H14N2O4S	[M+H]+	223.075	0	13.52	0.1	24	L-Cystathionine	24	5656218	5656.22	12215971	11105.4	8394742	8836.57	14605947	10819.2	6055536	5767.18	8840566	9067.25	11276807	12125.6	11585739	11585.7	8781148	6098.02	22278536	21841.7	12401900	10124	5008839	4393.72	36386672	39336.9	33792092	37134.2	22682776	25659.2	16665773	18517.5	18279620	23894.9	39700976	25948.4	31867794	35408.7	27839886
76	77 L-Glutamic acid	C5H9NO4	[M+H]+	148.06	-0.9	11.79	0.18	24	L-Glutamic acid	24	41657200	41657.2	87942792	79948	81254648	85531.2	100157808	74191	61021800	58116	119662992	122731	85252440	91669.3	93799680	93799.7	71156488	49414.2	111464048	109278	92151864	75226	85381192	74895.8	170083072	183874	174231440	191463	163896032	185403	121592392	135103	129509088	169293	202262624	132198	155271632	172524	140506048
77	78 L-Glutamine	C5H10N2O3	[M+H]+	147.076	-0.8	11.46	0.09	24	L-Glutamine	24	71199032	71199	134601424	122365	112779872	118716	112716640	83493.8	75922976	72307.6	163668672	167865	105237880	113159	116174784	116175	118600256	82361.3	127801776	125296	87569008	71484.9	108270336	94974	457699040	494810	464625344	510577	476231584	538724	315600928	350668	333401184	435819	520186112	339991	396482624	440536	424993120
78	79 L-Histidine	C6H9N3O2	[M+H]+	156.077	0.3	10.93	0.14	24	L-Histidine	24	32266770	32266.8	58111400	52828.5	55053240	57950.8	76329984	56540.7	44755324	42624.1	77692976	79685.1	57990540	62355.4	63703796	63703.8	61709680	42853.9	95589376	93715.1	65895720	53792.4	56348968	49428.9	90665728	98017	178992736	196695	112760672	127557	62357052	69285.6	64292300	84042.2	95675376	62532.9	106525704	118362	76733304
79	80 L-Isoleucine	C6H13NO2	[M+H]+	132.102	0	7.44	0.04	24	L-Isoleucine	24	31893926	31893.9	59023060	53657.3	66751668	70264.9	91150472	67518.9	58810812	56010.3	130950680	134308	70837944	76169.8	88283272	88283.3	94944944	65934	104845928	102790	84598792	69060.2	98208400	86147.7	148285776	160309	116355752	127863	97934424	110786	85778136	95309	89592304	117114	150193680	98165.8	127761808	141958	118844712
80	81 L-Kynurenine	C10H12N2O3	[M+H]+	209.092	0.6	7.47	0.43	24	L-Kynurenine	24	185672	185.672	1052833	957.121	533940	562.042	786411	582.527	633615	603.443	1076009	1103.6	471379	506.859	1216861	1216.86	565269	392.548	990727	971.301	1000677	816.879	631261	553.738	809834	875.496	895450	984.011	452029	511.345	496662	551.847	440908	576.35	904124	590.931	837346	930.384	515483
82	83 L-Leucine	C6H13NO2	[M+H]+	132.102	0.7	7.56	0.11	24	L-Leucine	24	47066688	47066.7	74263944	67512.7	95278424	100293	125175168	92722.3	77290952	73610.4	186806544	191596	106798016	114837	136111504	136112	128289088	89089.6	137622976	134924	128406024	104821	147006144	128953	194250160	210000	197671792	217222	142957184	161716	109731656	121924	123197536	161043	176227104	115181	176945952	196607	162658416
85	86 L-Methionine	C5H11NO2S	[M+H]+	150.058	-0.2	8.21	0.11	24	L-Methionine	24	15930836	15930.8	11492316	10447.6	14676059	15448.5	36723096	27202.3	10767127	10254.4	40463548	41501.1	33720888	36259	29877062	29877.1	24975202	17343.9	37567616	36831	33845916	27629.3	36198404	31753	59705796	64546.8	59456344	65336.6	57096768	64589.1	29753346	33059.3	33393742	43652	49621284	32432.2	50489564	56099.5	43895020
86	87 L-Phenylalanine	C9H11NO2	[M+H]+	166.086	-0.3	6.95	0.18	24	L-Phenylalanine	24	36747648	36747.6	52462340	47693	58741616	61833.3	92825376	68759.5	49445324	47090.8	121698128	124819	84091536	90421	91883976	91884	73623664	51127.5	105397616	103331	94945744	77506.7	90480976	79369.3	162981152	176196	181495648	199446	139695040	158026	100320384	111467	106570600	139308	166804352	109022	151780256	168645	140361824
87	88 L-Proline	C5H9NO2	[M+H]+	116.071	1.7	9.3	0.09	24	L-Proline	24	32984812	32984.8	51526092	46841.9	57430116	60452.8	100012392	74083.3	40158228	38245.9	105825808	108539	92886336	99877.8	78030544	78030.5	71815640	49872	107181432	105080	70462264	57520.2	71838664	63016.4	398868768	431209	393779552	432725	360245728	407518	243078912	270088	308259360	402953	424217856	277267	333436736	370485	360642272
88	89 L-Serine	C3H7NO3	[M+H]+	106.05	4.1	12.12	0.08	24	L-Serine	24	6141093	6141.09	9415543	8559.58	9857003	10375.8	10782028	7986.69	6269814	5971.25	14398859	14768.1	10379064	11160.3	10357744	10357.7	10398864	7221.43	14187545	13909.4	10138662	8276.46	10507199	9216.84	33551682	36272.1	36251252	39836.5	33153208	37503.6	24547226	27274.7	24920928	32576.4	33687984	22018.3	30068610	33409.6	28775604
89	90 L-Threonine	C4H9NO3	[M-H]-	118.051	-10.7	10.86	0.18	24	L-Threonine	24	1379780	1379.78	1705162	1550.15	1581749	1665	2229747	1651.66	1459897	1390.38	2155314	2210.58	2180007	2344.09	1981813	1981.81	1811749	1258.16	2481760	2433.1	1898140	1549.5	1650979	1448.23	6949942	7513.45	7339602	8065.5	5579465	6311.61	4600461	5111.62	4605128	6019.78	6946330	4540.08	6641031	7378.92	5303131
90	91 L-Tryptophan	C11H12N2O2	[M+H]+	205.097	-0.3	8.25	0.24	24	L-Tryptophan	24	3974958	3974.96	6539889	5945.35	10559202	11114.9	11631883	8616.21	5749331	5475.55	23367872	23967	9548097	10266.8	11942859	11942.9	13372991	9286.8	14285771	14005.7	12714403	10379.1	16050606	14079.5	45562312	49256.6	40101724	44067.8	30951944	35013.5	27630504	30700.6	26830074	35072	43668380	28541.4	38337344	42597	35402844
91	92 L-Tyrosine	C9H11NO3	[M+H]+	182.081	0.2	9.56	0.13	24	L-Tyrosine	24	11870196	11870.2	16008235	14552.9	15758490	16587.9	30171726	22349.4	16097239	15330.7	32155290	32979.8	25136582	27028.6	29579344	29579.3	22369350	15534.3	30724494	30122.1	28435018	23212.3	26630230	23359.9	59471184	64293.2	55124812	60576.7	43346380	49034.4	37891152	42101.3	33262612	43480.5	47550820	31079	54760404	60844.9	43776648
92	93 L-Valine	C5H11NO2	[M+H]+	118.086	2.1	9.04	0.12	24	L-Valine	24	30729178	30729.2	73049184	66408.3	74634480	78562.6	84225920	62389.6	71629648	68218.7	134507152	137956	61937956	66600	95649080	95649.1	84383952	58600	97571728	95658.6	95704264	78125.9	93330792	81869.1	140577632	151976	136260816	149737	108654152	122912	82313976	91460	88679464	115921	136950416	89510.1	126300472	140334	112033368
96	97 N-Acetyl-L-alanine	C5H9NO3	[M+H]+	132.065	0.6	6.65	0.32	24	N-Acetyl-L-alanine	24	69887	69.887	118787	107.988	63810	67.1684	369392	273.624	144504	137.623	175287	179.782	393710	423.344	369453	369.453	76692	53.2583	508226	498.261	234981	191.821	108212	94.9228	363762	393.256	209400	230.11	231705	262.11	181943	202.159	175965	230.02	509024	332.695	485151	539.057	519261
99	100 N-Acetylornithine	C7H14N2O3	[M+H]+	175.108	0.5	9.95	0.16	24	N-Acetylornithine	24	2896862	2896.86	6987280	6352.07	4286260	4511.85	10709782	7933.17	4890628	4657.74	5827473	5976.9	10600390	11398.3	12164415	12164.4	6241400	4334.31	16642787	16316.5	10825657	8837.27	5978992	5244.73	30573628	33052.6	34155368	37533.4	22561916	25522.5	11296907	12552.1	19403680	25364.3	29682124	19400.1	32619444	36243.8	26250988
100	101 N-Acetylserine	C5H9NO4	[M-H]-	146.046	-8.1	8.1	0.34	24	N-Acetylserine	24	661537	661.537	2112594	1920.54	1673792	1761.89	2550401	1889.19	1812807	1726.48	3521560	3611.86	1725916	1855.82	2795706	2795.71	1694746	1176.91	2834081	2778.51	2279384	1860.72	1943748	1705.04	3866314	4179.8	4467452	4909.29	5251860	5941.02	1909193	2121.33	2837792	3709.53	5409572	3535.67	3465230	3850.26	3408633
106	107 Nicotinic acid	C6H5NO2	[M-H]-	122.025	-11.1	5.64	0.35	24	Nicotinic acid	24	224596	224.596	399779	363.435	473677	498.607	820945	608.107	322793	307.422	1234873	1266.54	703130	756.054	775375	775.375	696169	483.451	953251	934.56	708381	578.27	787736	690.996	25388528	27447.1	27503428	30223.5	23365576	26431.6	15206316	16895.9	14554026	19024.9	28221402	18445.4	21811168	24234.6	19152220
109	110 Orotic acid	C5H4N2O4	[M-H]-	155.01	-7.9	7.87	0.34	24	Orotic acid	24	67181	67.181	453420	412.2	119845	126.153	234089	173.399	351121	334.401	202973	208.177	107650	115.753	246617	246.617	138780	96.375	283231	277.677	261075	213.122	98870	86.7281	321267	347.316	1385400	1522.42	726823	822.198	172049	191.166	333781	436.315	1418019	926.81	474702	527.447	750971
115	116 Pantothenic acid	C9H17NO5	[M+H]+	220.118	0.2	6.36	0.3	24	Pantothenic acid	24	1456729	1456.73	4537104	4124.64	2569756	2705.01	6832768	5061.31	3565814	3396.01	6564328	6732.64	4981666	5356.63	6166014	6166.01	3924963	2725.67	5999854	5882.21	4300848	3510.9	3030101	2657.98	57590260	62259.7	64386192	70754.1	56413932	63816.7	30949848	34388.7	33466712	43747.3	67684760	44238.4	46751320	51945.9	48754920
122	123 Pipecolic acid	C6H11NO2	[M+H]+	130.086	0.3	8.93	0.47	24	Pipecolic acid	24	174186	174.186	978308	889.371	761306	801.375	1083336	802.471	933415	888.967	1576577	1617	478654	514.682	1303593	1303.59	876839	608.916	1620108	1588.34	1401639	1144.2	964107	845.708	1533752	1658.11	1821011	2001.11	2202732	2491.78	908284	1009.2	1161743	1518.62	3124182	2041.95	1461488	1623.88	1502707
123	124 Propionylcarnitine	C10H19NO4	[M+H]+	218.139	0.1	6.66	0.39	24	Propionylcarnitine	24	381305	381.305	2421907	2201.73	2768038	2913.72	1752516	1298.16	1528795	1456	4138655	4244.77	1251350	1345.54	1700499	1700.5	1178666	818.518	2102261	2061.04	1609996	1314.28	1747845	1533.2	32972632	35646.1	32485000	35697.8	21879668	24750.8	18113684	20126.3	19108556	24978.5	16646144	10879.8	29073578	32304	23576210
126	127 Saccharopine	C11H20N2O6	[M-H]-	275.125	-1.7	12.74	0.09	24	Saccharopine	24	27020	27.02	83318	75.7436	98054	103.215	77193	57.18	46735	44.5095	201048	206.203	55112	59.2602	89118	89.118	93403	64.8632	137582	134.884	77910	63.6	95351	83.6412	222027	240.029	174051	191.265	209836	237.371	78306	87.0067	109576	143.237	341348	223.103	185174	205.749	209792
129	130 Sarcosine	C3H7NO2	[M+H]+	90.055	6	11.21	0.02	24	Sarcosine	24	23830362	23830.4	33877832	30798	37192752	39150.3	57371060	42497.1	30960832	29486.5	60750572	62308.3	51187016	55039.8	55212296	55212.3	40085504	27837.2	59723260	58552.2	48027476	39206.1	38311224	33606.3	146441952	158316	149361680	164134	126169680	142726	107832368	119814	105839872	138353	163472080	106844	137071488	152302	125429328
133	134 Uracil	C4H4N2O2	[M+H]+	113.035	3.1	6.84	0.41	24	Uracil	24	47877	47.877	80105	72.8227	92787	97.6705	124870	92.4963	46853	44.6219	95772	98.2277	212473	228.466	67618	67.618	36240	25.1667	83442	81.8059	82864	67.6441	102516	89.9263	727049	785.999	2086430	2292.78	963165	1089.55	186129	206.81	229211	299.622	270616	176.873	724760	805.289	1113200
136	137 Uric acid	C5H4N4O3	[M+H]+	169.036	-0.1	9.95	0.15	24	Uric acid	24	754917	754.917	1476182	1341.98	1546089	1627.46	1659796	1229.48	987487	940.464	2097879	2151.67	1354283	1456.22	1836146	1836.15	1333370	925.951	1401470	1373.99	1522745	1243.06	1558104	1366.76	114911	124.228	84497	92.8538	26168	29.6018	28623	31.8033	36032	47.1007	36893	24.1131	80840	89.8222	64811
137	138 Uridine	C9H12N2O6	[M-H]-	243.062	-2.3	6.92	0.3	24	Uridine	24	238802	238.802	860510	782.282	730097	768.523	1164775	862.796	439766	418.825	964746	989.483	1934850	2080.48	661305	661.305	525498	364.929	995178	975.665	724250	591.224	993416	871.418	3482704	3765.09	6748765	7416.23	3735267	4225.42	1522169	1691.3	1694369	2214.86	2009978	1313.71	3403016	3781.13	786904
139	140 Uridine 5'-monophosphate	C9H13N2O9P	[M-H]-	323.029	-1.2	12.4	0.12	24	Uridine 5'-monophosphate	24	331050	331.05	781452	710.411	750645	790.153	1084367	803.235	396139	377.275	1491201	1529.44	243716	262.06	1046943	1046.94	1367646	949.754	1477256	1448.29	820573	669.856	683757	599.787	5034637	5442.85	399487	438.997	3450202	3902.94	2362248	2624.72	2722840	3559.27	4677354	3057.09	3809378	4232.64	3687108
140	141 Uridine diphosphate glucose	C15H24N2O17P2	[M-H]-	565.048	-0.8	13.73	0.11	24	Uridine diphosphate glucose	24	35744	35.744	235337	213.943	176178	185.451	320124	237.129	130578	124.36	445739	457.168	209345	225.102	265443	265.443	185320	128.694	223065	218.691	155328	126.798	190285	166.917	876547	947.618	884260	971.714	792373	896.35	609637	677.374	450261	588.576	1351255	883.173	561502	623.891	699473
143	144 Valerylcarnitine	C12H23NO4	[M+H]+	246.17	-0.8	5.06	0.46	24	Valerylcarnitine	24	46748	46.748	336217	305.652	127754	134.478	545790	404.289	198339	188.894	274818	281.865	349778	376.105	439695	439.695	106969	74.284	624385	612.142	235342	192.116	87464	76.7228	1751756	1893.79	1689158	1856.22	1044148	1181.16	751114	834.571	856422	1119.51	1857923	1214.33	1340583	1489.54	1476111
144	145 Xanthine	C5H4N4O2	[M-H]-	151.026	-7.6	8.73	0.35	24	Xanthine	24	3334396	3334.4	3439103	3126.46	3949980	4157.87	6030307	4466.89	3530783	3362.65	6280104	6441.13	6088029	6546.27	4840865	4840.86	3973748	2759.55	6342951	6218.58	5847990	4773.87	6103474	5353.92	2897605	3132.55	10278234	11294.8	2822521	3192.9	2538380	2820.42	2192831	2866.45	4706976	3076.45	3050004	3388.89	2463648
13	14 Adenosine	C10H13N5O4	[M+H]+	268.104	0.3	6.07	0.15	23	Adenosine	23	7467153	7467.15	14346511	13042.3	10535258	11089.7	10346292	7663.92	6511980	6201.89	5290174	5425.82	17768924	19106.4	12629649	12629.6	12960475	9000.33	8820956	8648	6450924	5266.06	13226789	11602.4	3315945	3584.81	-	-	6536149	7393.83	7480815	8312.02	3174918	4150.22	7927394	5181.3	5294230	5882.48	8416513
43	44 Dihydroxyacetone phosphate	C3H7O6P	[M-H]-	168.991	-5.6	12.58	0.17	23	Dihydroxyacetone phosphate	23	-	-	55633	50.5755	45253	47.6347	343708	254.599	46880	44.6476	109240	112.041	158412	170.335	84815	84.815	93044	64.6139	216438	212.194	198206	161.801	109716	96.2421	259139	280.15	187255	205.775	158052	178.792	141154	156.838	109523	143.167	422752	276.308	230268	255.853	180174
50	51 Fructose 6-phosphate	C6H13O9P	[M-H]-	259.022	-2.1	13.17	0.23	23	Fructose 6-phosphate	23	-	-	136295	123.905	147218	154.966	185040	137.067	88799	84.5705	269186	276.088	131781	141.7	165572	165.572	196142	136.21	228152	223.678	146742	119.789	123648	108.463	658042	711.397	530200	582.637	433707	490.619	244931	272.146	306857	401.12	464831	303.811	437315	485.906	409220
51	52 Fumaric acid	C4H4O4	[M-H]-	115.004	-11.2	13.33	0.25	23	Fumaric acid	23	-	-	868478	789.525	881145	927.521	988880	732.504	574173	546.831	1584482	1625.11	650871	699.861	882471	882.471	1088778	756.096	1101870	1080.26	814516	664.911	913551	801.361	2190690	2368.31	2484362	2730.07	2024783	2290.48	1777216	1974.68	1574675	2058.4	4037331	2638.78	1886841	2096.49	2130852
97	98 N-Acetyl-L-methionine	C7H13NO3S	[M+H]+	192.069	1.1	4.66	0.4	23	N-Acetyl-L-methionine	23	22219	22.219	75629	68.7536	38868	40.9137	131546	97.4415	51814	49.3467	79146	81.1754	51687	55.5774	145953	145.953	66833	46.4118	110741	108.57	85330	69.6571	62958	55.2263	35890	38.8	-	-	34650	39.1968	12193	13.5478	18684	24.4235	74193	48.4922	29087	32.3189	70826
95	96 N-Acetylglutamine	C7H12N2O4	[M-H]-	187.072	-4.4	8.1	0.28	23	N-Acetylglutamine	23	-	-	23451	21.3191	15937	16.7758	40033	29.6541	19496	18.5676	46977	48.1815	28849	31.0204	39875	39.875	14702	10.2097	47556	46.6235	30231	24.6784	17161	15.0535	549737	594.31	546552	600.607	587162	664.21	324696	360.773	397833	520.043	562540	367.673	495364	550.404	376525
113	114 Oxoglutaric acid	C5H6O5	[M-H]-	145.014	-7.9	12.9	0.21	23	Oxoglutaric acid	23	-	-	1049992	954.538	595396	626.733	984530	729.281	650835	619.843	1362194	1397.12	610016	655.931	695548	695.548	968873	672.828	1076215	1055.11	956212	780.581	1078823	946.336	3628122	3922.29	3759006	4130.78	3330130	3767.12	1037432	1152.7	1260280	1647.42	3078015	2011.77	2479582	2755.09	1352497
120	121 Phosphorylcholine	C5H14NO4P	[M+H]+	184.073	-0.1	11.87	0.11	23	Phosphorylcholine	23	17850066	17850.1	39566644	35969.7	42877896	45134.6	25456264	18856.5	-	-	46882180	48084.3	34453140	37046.4	21057604	21057.6	44783324	31099.5	60385040	59201	24534552	20028.2	24892920	21835.9	262966416	284288	296714368	326060	243116448	275019	151647584	168497	172283968	225208	269903040	176407	233114192	259016	244662544
128	129 S-Adenosylmethionine	C15H22N6O5S	[M+H]+	399.144	0.5	12.16	0.19	23	S-Adenosylmethionine	23	1575271	1575.27	3246617	2951.47	3429302	3609.79	1358323	1006.17	-	-	2714634	2784.24	2162127	2324.87	1514422	1514.42	3834158	2662.61	4236477	4153.41	2081995	1699.59	1634368	1433.66	14917263	16126.8	6537600	7184.18	11036093	12484.3	7706288	8562.54	9376040	12256.3	12993679	8492.6	9311215	10345.8	11309822
130	131 Succinic acid	C4H6O4	[M-H]-	117.019	-11.4	12.52	0.08	23	Succinic acid	23	-	-	2064974	1877.25	1905042	2005.31	3077669	2279.75	1557632	1483.46	3366508	3452.83	2545353	2736.94	3593278	3593.28	2274079	1579.22	3889982	3813.71	2274675	1856.88	1525571	1338.22	9135113	9875.8	7581368	8331.17	10272673	11620.7	4791982	5324.42	4557480	5957.49	11303842	7388.13	5152622	5725.14	7759498
138	139 Uridine 5'-diphosphate	C9H14N2O12P2	[M+H]+	405.01	-4.9	13.69	0.25	23	Uridine 5'-diphosphate	23	-	-	23592	21.4473	20977	22.0811	29732	22.0237	15791	15.039	48218	49.4544	17039	18.3215	27349	27.349	20323	14.1132	21702	21.2765	20091	16.4008	21435	18.8026	53876	58.2443	48517	53.3154	56224	63.6018	33178	36.8644	37633	49.1935	67464	44.0941	40474	44.9711	49468
141	142 Uridine diphosphate-N-acetylglucosamine	C17H27N3O17P2	[M+H]+	608.089	-1.4	12.5	0.21	23	Uridine diphosphate-N-acetylglucosamine	23	-	-	45342	41.22	30834	32.4568	59692	44.2163	33377	31.7876	63486	65.1138	33479	35.9989	49905	49.905	35196	24.4417	56183	55.0814	27064	22.0931	31405	27.5482	114401	123.677	149630	164.429	93094	105.31	116818	129.798	110177	144.022	228592	149.407	70115	77.9056	116578
52	53 Glucose 6-phosphate	C6H13O9P	[M-H]-	259.022	-1.7	14.07	0.11	22	Glucose 6-phosphate	22	-	-	398332	362.12	458817	482.965	558489	413.696	245825	234.119	486248	498.716	336323	361.638	408540	408.54	561196	389.719	626548	614.263	302590	247.012	-	-	1661008	1795.68	1194009	1312.1	1070563	1211.04	778357	864.841	903221	1180.68	1418775	927.304	1293460	1437.18	1203600
54	55 Glycerol 3-phosphate	C3H9O6P	[M-H]-	171.006	-5.9	12.18	0.07	22	Glycerol 3-phosphate	22	-	-	5082572	4620.52	6826520	7185.81	7377964	5465.16	-	-	9632901	9879.9	6480310	6968.08	6023571	6023.57	6201457	4306.57	8970586	8794.69	5605236	4575.7	4263144	3739.6	14932604	16143.4	31651856	34782.3	19343974	21882.3	6606004	7340	7231316	9452.7	14038708	9175.63	15091139	16767.9	10035906
81	82 L-Lactic acid	C3H6O3	[M-H]-	89.0244	-14.8	7.29	0.1	22	L-Lactic acid	22	-	-	2026550	1842.32	1693531	1782.66	5014949	3714.78	2717017	2587.64	3376852	3463.44	4464765	4800.82	6113804	6113.8	3455999	2400	4255770	4172.32	2378585	1941.7	-	-	9819340	10615.5	7691960	8452.7	5532924	6258.96	4417300	4908.11	4568518	5971.92	15239936	9960.74	7771564	8635.07	12464850
84	85 L-Malic acid	C4H6O5	[M-H]-	133.014	-9.4	13.34	0.17	22	L-Malic acid	22	-	-	19382416	17620.4	20393662	21467	21197696	15702	-	-	32911778	33755.7	15726059	16909.7	17840574	17840.6	23347238	16213.4	25203720	24709.5	18616856	15197.4	19979774	17526.1	43701244	47244.6	51606500	56710.4	41419252	46854.4	35661492	39623.9	33028898	43175	72269528	47235	42637124	47374.6	43654276
36	37 Cytidine monophosphate	C9H14N3O8P	[M+H]+	324.059	1.4	13.07	0.13	21	Cytidine monophosphate	21	-	-	66674	60.6127	66022	69.4968	152816	113.197	45223	43.0695	193505	198.467	-	-	133505	133.505	119624	83.0722	161065	157.907	87547	71.4669	67931	59.5886	235239	254.312	-	-	158751	179.583	135838	150.931	151678	198.272	398128	260.214	174605	194.006	198194
60	61 Guanosine monophosphate	C10H14N5O8P	[M+H]+	364.065	-0.8	13.84	0.14	21	Guanosine monophosphate	21	-	-	255787	232.534	232829	245.083	352877	261.39	-	-	809132	829.879	-	-	543328	543.328	795749	552.603	895333	877.777	473160	386.253	291070	255.325	1156820	1250.62	269788	296.47	711083	804.393	947140	1052.38	764104	998.829	2009260	1313.24	1045062	1161.18	1293196
127	128 S-Adenosylhomocysteine	C14H20N6O5S	[M-H]-	383.114	-4.7	9.94	0.14	21	S-Adenosylhomocysteine	21	-	-	29965	27.2409	13778	14.5032	47252	35.0015	14910	14.2	25743	26.4031	26482	28.4753	36187	36.187	18250	12.6736	37691	36.952	24607	20.0873	-	-	36614	39.5827	37925	41.6758	18336	20.7421	-	-	20088	26.2588	39089	25.5484	22444	24.9378	22526
131	132 Taurine	C2H7NO3S	[M-H]-	124.007	-6.4	11.48	0.15	21	Taurine	21	-	-	21649	19.6809	-	-	35185	26.063	40171	38.2581	19764	20.2708	27502	29.572	40529	40.529	21294	14.7875	90913	89.1304	33976	27.7355	-	-	56436	61.0119	35681	39.2099	38816	43.9095	76901	85.4456	93549	122.286	52593	34.3745	67866	75.4067	64538
135	136 Ureidosuccinic acid	C5H8N2O5	[M-H]-	175.036	-6	14	0.28	20	Ureidosuccinic acid	20	35943	35.943	153935	139.941	44519	46.8621	82595	61.1815	-	-	28583	29.3159	39287	42.2441	-	-	-	-	190122	186.394	27030	22.0653	-	-	1067517	1154.07	1637677	1799.65	1306164	1477.56	235356	261.507	879641	1149.86	1972144	1288.98	1311612	1457.35	1503468
29	30 cis-Aconitic acid	C6H6O6	[M-H]-	173.009	-6.7	15.23	0.26	19	cis-Aconitic acid	19	-	-	658635	598.759	539594	567.994	583192	431.994	-	-	567245	581.79	-	-	-	-	-	-	714506	700.496	520341	424.768	504183	442.266	1119273	1210.02	694699	763.405	1419195	1605.42	1268888	1409.88	1178236	1540.18	1574355	1028.99	1186840	1318.71	2130651
114	115 Palmitic acid	C16H32O2	[M-H]-	255.233	-2.2	2.95	0.07	19	Palmitic acid	19	-	-	1760110	1600.1	1489922	1568.34	-	-	-	-	1274748	1307.43	-	-	-	-	3006839	2088.08	4435870	4348.89	1356344	1107.22	9222928	8090.29	10385551	11227.6	9822068	10793.5	18149578	20531.2	38918180	43242.4	13449392	17580.9	25007232	16344.6	36589100	40654.6	33128608
70	71 L-Asparagine	C4H8N2O3	[M+H]+	133.061	-0.5	11.67	0.14	18	L-Asparagine	18	3079388	3079.39	3744092	3403.72	3399326	3578.24	-	-	-	-	-	-	2806733	3017.99	-	-	4911284	3410.61	3171489	3109.3	-	-	-	-	61506632	66493.7	49412308	54299.2	57750724	65328.9	41665084	46294.5	45641384	59661.9	48323680	31584.1	47854840	53172	47072636
124	125 Pyruvic acid	C3H4O3	[M-H]-	87.0088	-14.6	6.22	0.27	18	Pyruvic acid	18	-	-	-	-	71268	75.0189	160524	118.907	-	-	182456	187.134	121551	130.7	-	-	110111	76.466	171281	167.923	-	-	-	-	554360	599.308	780485	857.676	542791	614.017	331082	367.869	272828	356.638	637657	416.769	457672	508.524	296997
134	135 Ureidopropionic acid	C4H8N2O3	[M-H]-	131.046	-10	11.61	0.2	18	Ureidopropionic acid	18	878206	878.206	1098544	998.676	933576	982.712	-	-	-	-	-	-	774201	832.474	-	-	1341139	931.347	754166	739.378	-	-	-	-	13835900	14957.7	11111140	12210	12956747	14657	9161405	10179.3	10103663	13207.4	9694728	6336.42	10880356	12089.3	10854274
45	46 D-Sedoheptulose 7-phosphate	C7H15O10P	[M-H]-	289.033	-2.1	13.51	0.16	17	D-Sedoheptulose 7-phosphate	17	-	-	-	-	61587	64.8284	49211	36.4526	-	-	70815	72.6308	-	-	-	-	58000	40.2778	78693	77.15	-	-	-	-	339152	366.651	294177	323.271	227406	257.247	121010	134.456	152140	198.876	216465	141.48	284624	316.249	251126
53	54 Glutathione	C10H17N3O6S	[M+H]+	308.091	-1.6	11.57	0.1	16	Glutathione	16	-	-	-	-	-	-	-	-	688104	655.337	2058537	2111.32	-	-	-	-	1698526	1179.53	1088764	1067.42	-	-	-	-	4591717	4964.02	1380623	1517.17	994227	1124.69	1389596	1544	1567099	2048.5	11052297	7223.72	1579550	1755.06	1590427
75	76 L-Cystine	C6H12N2O4S2	[M-H]-	239.017	-3.7	12.97	0.18	16	L-Cystine	16	-	-	-	-	-	-	-	-	-	-	-	-	-	-	-	-	12532	8.70278	13192	12.9333	12279	10.0237	16553	14.5202	23339	25.2314	49373	54.256	27147	30.7093	21716	24.1289	32823	42.9059	33019	21.581	31193	34.6589	51693
108	109 Ornithine	C5H12N2O2	[M+H]+	133.097	0.3	17.09	0.19	16	Ornithine	16	-	-	8563936	7785.4	8073928	8498.87	9521027	7052.61	-	-	12121775	12432.6	7576431	8146.7	8068768	8068.77	9106640	6324.06	11197027	10977.5	9195274	7506.35	7999618	7017.21	11009602	11902.3	7572938	8321.91	-	-	-	-	-	-	-	-	8177161	9085.73	8369285
111	112 Oxidized glutathione	C20H32N6O12S2	[M+H]+	613.159	1.7	14.84	0.09	16	Oxidized glutathione	16	-	-	253439	230.399	313134	329.615	-	-	-	-	304110	311.908	-	-	-	-	-	-	234731	230.128	-	-	-	-	1647107	1780.66	1516982	1667.01	1773722	2006.47	487672	541.858	597678	781.278	986939	645.058	1360594	1511.77	1199207
47	48 FAD	C27H33N9O15P2	[M+H]+	786.164	-0.9	8.89	0.29	15	FAD	15	-	-	11691	10.6282	-	-	13339	9.88074	-	-	16285	16.7026	-	-	-	-	-	-	12785	12.5343	-	-	-	-	54718	59.1546	-	-	39151	44.2885	33131	36.8122	30284	39.5869	40028	26.1621	33023	36.6922	41235
66	67 Inosinic acid	C10H13N4O8P	[M+H]+	349.054	2.1	12.67	0.13	15	Inosinic acid	15	-	-	-	-	-	-	-	-	-	-	-	-	-	-	-	-	28518	19.8042	29410	28.8333	23733	19.3739	26702	23.4228	52027	56.2454	-	-	36887	41.7274	35381	39.3122	31379	41.0183	111616	72.9516	34476	38.3067	40055
101	102 NAD	C21H28N7O14P2	[Cat]+	664.116	-2.7	11.13	0.16	15	NAD	15	-	-	62779	57.0718	56503	59.4768	28123	20.8319	24942	23.7543	39601	40.6164	-	-	38538	38.538	45983	31.9326	-	-	17080	13.9429	21334	18.714	22371	24.1849	-	-	48537	54.9061	-	-	-	-	-	-	44245	49.1611	15979
107	108 O-Phosphoethanolamine	C2H8NO4P	[M+H]+	142.026	0.9	12.96	0.22	15	O-Phosphoethanolamine	15	-	-	-	-	794520	836.337	-	-	-	-	-	-	-	-	-	-	720798	500.554	687912	674.424	-	-	-	-	2959458	3199.41	2853813	3136.06	2065371	2336.39	1239248	1376.94	1660222	2170.22	3046508	1991.18	2678842	2976.49	2618412
83	84 L-Lysine	C6H14N2O2	[M+H]+	147.113	-0.7	18.54	0.1	14	L-Lysine	14	-	-	-	-	23903678	25161.8	-	-	-	-	-	-	-	-	-	-	23270542	16160.1	25190066	24696.1	-	-	-	-	36417268	39370	34493968	37905.5	33767616	38198.7	21136608	23485.1	-	-	28447522	18593.2	39585540	43983.9	30768254
30	31 Citric acid	C6H8O7	[M-H]-	191.02	-4.3	15.67	0.27	13	Citric acid	13	-	-	-	-	125145	131.732	-	-	-	-	-	-	-	-	-	-	-	-	-	-	-	-	-	-	2632785	2846.25	3404595	3741.31	920314	1041.08	454348	504.831	432577	565.46	1359353	888.466	2043236	2270.26	1900333
121	122 Phosphoserine	C3H8NO6P	[M+H]+	186.016	0	11.83	0.44	13	Phosphoserine	13	25919	25.919	43580	39.6182	43394	45.6779	41339	30.6215	45836	43.6533	52004	53.3374	31286	33.6409	46011	46.011	43171	29.9799	36218	35.5078	45911	37.4784	31065	27.25	-	-	-	-	-	-	-	-	46263	60.4745	-	-	-	-	-
9	10 Acetoacetic acid	C4H6O3	[M-H]-	101.024	-13.1	9.74	0.44	12	Acetoacetic acid	12	-	-	-	-	-	-	-	-	-	-	-	-	-	-	-	-	-	-	-	-	-	-	-	-	375764	406.231	399091	438.562	355539	402.193	245758	273.064	262307	342.885	347398	227.058	262742	291.936	296514
33	34 Creatinine	C4H7N3O	[M+H]+	114.066	2.7	6.68	0.27	12	Creatinine	12	-	-	-	-	746428	785.714	-	-	-	-	-	-	-	-	-	-	-	-	-	-	-	-	-	-	221957	239.954	183641	201.803	193552	218.95	-	-	147303	192.553	328424	214.656	2468579	2742.87	556942
34	35 Cyclic AMP	C10H12N5O6P	[M-H]-	328.045	-2.3	6.38	0.33	12	Cyclic AMP	12	-	-	-	-	-	-	-	-	-	-	-	-	-	-	-	-	-	-	12687	12.4382	-	-	-	-	85940	92.9081	-	-	67824	76.724	45022	50.0244	64628	84.481	125878	82.2732	46115	51.2389	79395
56	57 Guanidoacetic acid	C3H7N3O2	[M+H]+	118.061	1.7	12.02	0.33	12	Guanidoacetic acid	12	-	-	-	-	-	-	-	-	-	-	-	-	-	-	-	-	-	-	-	-	-	-	-	-	104756	113.25	75372	82.8264	88811	100.465	49150	54.6111	53470	69.8954	113189	73.9797	102466	113.851	62843
18	19 ADP	C10H15N5O10P2	[M-H]-	426.022	-3.2	12.39	0.26	11	ADP	11	-	-	-	-	-	-	71370	52.8667	-	-	66202	67.8995	-	-	-	-	65647	45.5882	80246	78.6725	-	-	-	-	104835	113.335	-	-	-	-	-	-	-	-	74097	48.4294	-	-	92299
118	119 Phosphoenolpyruvic acid	C3H5O6P	[M-H]-	166.975	-6	14.83	0.3	11	Phosphoenolpyruvic acid	11	-	-	-	-	-	-	-	-	-	-	-	-	-	-	-	-	-	-	-	-	-	-	-	-	486536	525.985	620815	682.214	167443	189.415	-	-	113672	148.591	246579	161.163	257589	286.21	262211
132	133 Thymidine	C10H14N2O5	[M-H]-	241.083	-4.1	4.75	0.39	11	Thymidine	11	-	-	-	-	-	-	-	-	-	-	-	-	-	-	-	-	-	-	-	-	-	-	-	-	26119	28.2368	70612	77.5956	36718	41.5362	-	-	15126	19.7725	18286	11.9516	26594	29.5489	20587
44	45 D-Ribose 5-phosphate	C5H11O8P	[M-H]-	229.012	-2.5	12.85	0.3	10	D-Ribose 5-phosphate	10	-	-	-	-	-	-	-	-	-	-	-	-	-	-	-	-	-	-	-	-	-	-	-	-	449785	486.254	2498374	2745.47	311852	352.774	-	-	-	-	487594	318.689	450351	500.39	275120
146	147 Xanthylic acid	C10H13N4O9P	[M-H]-	363.035	-6.2	12.34	0.19	10	Xanthylic acid	10	-	-	-	-	-	-	-	-	-	-	-	-	-	-	-	-	-	-	-	-	-	-	-	-	27707	29.9535	43444	47.7407	33211	37.569	-	-	-	-	26948	17.6131	21267	23.63	14080
3	4 3-Phosphoglyceric acid	C3H7O7P	[M-H]-	184.986	-3.6	14.6	0.48	8	3-Phosphoglyceric acid	8	-	-	-	-	-	-	-	-	-	-	-	-	-	-	-	-	-	-	-	-	-	-	-	-	39448	42.6465	45432	49.9253	-	-	-	-	-	-	22970	15.0131	25119	27.91	28436
93	94 N6-Acetyl-L-lysine	C8H16N2O3	[M+H]+	189.123	-6.7	3.25	0.17	8	N6-Acetyl-L-lysine	8	-	-	-	-	-	-	669124	495.647	-	-	-	-	-	-	-	-	-	-	355626	348.653	-	-	391022	343.002	-	-	1079657	1186.44	-	-	351105	390.117	-	-	331748	216.829	-	-	-
145	146 Xanthosine	C10H12N4O6	[M-H]-	283.068	-1.1	8.02	0.31	7	Xanthosine	7	-	-	-	-	-	-	-	-	-	-	-	-	-	-	-	-	-	-	-	-	-	-	10333	9.06404	13027	14.0832	16961	18.6385	10878	12.3054	-	-	-	-	-	-	11730	13.0333	-
105	106 Niacinamide	C6H6N2O	[M+H]+	123.055	1.7	4.72	0.09	4	Niacinamide	4	-	-	-	-	-	-	2723592	2017.48	-	-	-	-	-	-	-	-	-	-	-	-	-	-	-	-	-	-	4915048	5401.15	-	-	2124966	2361.07	-	-	2399732	1568.45	-	-	-
125	126 Ribose 1-phosphate	C5H11O8P	[M-H]-	229.012	-3	12.24	0.16	4	Ribose 1-phosphate	4	-	-	-	-	-	-	-	-	-	-	-	-	587092	631.282	-	-	-	-	-	-	-	-	-	-	617297	667.348	3476783	3820.64	-	-	-	-	-	-	-	-	692936	769.929	-
32	33 Creatine	C4H9N3O2	[M+H]+	132.077	1.9	10.97	0.19	2	Creatine	2	-	-	-	-	-	-	-	-	-	-	-	-	-	-	-	-	-	-	-	-	-	-	-	-	-	-	-	-	-	-	-	-	-	-	-	-	397550	441.722	309677
69	70 L-Arginine	C6H14N4O2	[M+H]+	175.119	-0.3	19.41	0.14	2	L-Arginine	2	-	-	-	-	-	-	-	-	-	-	-	-	-	-	-	-	-	-	-	-	-	-	-	-	-	-	-	-	-	-	-	-	-	-	-	-	118483792	131649	-
7	8 5-Phosphoribosylamine	C5H12NO7P	[M-H]-	228.028	-4.7	12.83	0.43	1	5-Phosphoribosylamine	1	-	-	-	-	-	-	-	-	-	-	-	-	-	-	-	-	-	-	-	-	-	-	-	-	-	-	15643	17.1901	-	-	-	-	-	-	-	-	-	-	-
10	11 Acetyl-CoA	C23H38N7O17P3S	[M+H]+	810.133	-11.9	9.18	0	1	Acetyl-CoA	1	-	-	-	-	-	-	-	-	-	-	-	-	-	-	-	-	-	-	-	-	-	-	-	-	-	-	-	-	-	-	-	-	-	-	-	-	12156	13.5067	-
11	12 Acetylcysteine	C5H9NO3S	[M+H]+	164.038	2.5	7.03	0.43	1	Acetylcysteine	1	-	-	-	-	-	-	-	-	-	-	-	-	-	-	-	-	-	-	-	-	-	-	-	-	-	-	-	-	-	-	-	-	-	-	-	-	-	-	-
26	27 Carnosine	C9H14N4O3	[M+H]+	227.114	-5.1	11.87	0.42	1	Carnosine	1	-	-	-	-	-	-	-	-	-	-	-	-	-	-	-	-	-	-	-	-	-	-	-	-	18706	20.2227	-	-	-	-	-	-	-	-	-	-	-	-	-
103	104 NADP	C21H29N7O17P3	[Cat]+	744.083	0.9	14.08	0.25	1	NADP	1	-	-	-	-	-	-	-	-	-	-	-	-	-	-	-	-	-	-	-	-	-	-	-	-	-	-	-	-	-	-	-	-	-	-	-	-	-	-	-
112	113 Oxoadipic acid	C6H8O5	[M-H]-	159.03	-7.5	8.63	0.43	1	Oxoadipic acid	1	-	-	-	-	-	-	-	-	-	-	-	-	-	-	-	-	-	-	-	-	-	-	-	-	-	-	-	-	-	-	-	-	-	-	-	-	-	-	-
117	118 Phosphocreatine	C4H10N3O5P	[M-H]-	210.029	15.1	12.66	0.39	1	Phosphocreatine	1	-	-	-	-	-	-	-	-	-	-	-	-	-	-	-	-	-	-	-	-	-	-	-	-	-	-	-	-	-	-	-	-	-	-	-	-	-	-	-
0	1 1-Methylnicotinamide	C7H8N2O	[M+H]+	137.071	0.4	19.48	0.44	0	1-Methylnicotinamide	0	-	-	-	-	-	-	-	-	-	-	-	-	-	-	-	-	-	-	-	-	-	-	-	-	-	-	-	-	-	-	-	-	-	-	-	-	-	-	-
1	2 2,3-Diphosphoglyceric acid	C3H8O10P2	[M-H]-	264.952	-7.5	14.9	0.2	0	2,3-Diphosphoglyceric acid	0	-	-	-	-	-	-	-	-	-	-	-	-	-	-	-	-	-	-	-	-	-	-	-	-	-	-	-	-	-	-	-	-	-	-	-	-	-	-	-
2	3 3-Hydroxybutyric acid	C4H8O3	[M-H]-	103.04	-13.3	7.45	0.35	0	3-Hydroxybutyric acid	0	-	-	-	-	-	-	-	-	-	-	-	-	-	-	-	-	-	-	-	-	-	-	-	-	-	-	-	-	-	-	-	-	-	-	-	-	-	-	-
8	9 6-Phosphogluconic acid	C6H13O10P	[M-H]-	275.017	-2	15.66	0.42	0	6-Phosphogluconic acid	0	-	-	-	-	-	-	-	-	-	-	-	-	-	-	-	-	-	-	-	-	-	-	-	-	-	-	-	-	-	-	-	-	-	-	-	-	-	-	-
14	15 Adenosine diphosphate ribose	C15H23N5O14P2	[M-H]-	558.064	14.5	12.16	0.27	0	Adenosine diphosphate ribose	0	-	-	-	-	-	-	-	-	-	-	-	-	-	-	-	-	-	-	-	-	-	-	-	-	-	-	-	-	-	-	-	-	-	-	-	-	-	-	-
16	17 Adenosine triphosphate	C10H16N5O13P3	[M-H]-	505.988	-0.7	14.32	0.38	0	Adenosine triphosphate	0	-	-	-	-	-	-	-	-	-	-	-	-	-	-	-	-	-	-	-	-	-	-	-	-	-	-	-	-	-	-	-	-	-	-	-	-	-	-	-
17	18 Adenylsuccinic acid	C14H18N5O11P	[M-H]-	462.067	-0.6	15.76	0.24	0	Adenylsuccinic acid	0	-	-	-	-	-	-	-	-	-	-	-	-	-	-	-	-	-	-	-	-	-	-	-	-	-	-	-	-	-	-	-	-	-	-	-	-	-	-	-
21	22 Argininosuccinic acid	C10H18N4O6	[M-H]-	289.115	-6.1	13.83	0.27	0	Argininosuccinic acid	0	-	-	-	-	-	-	-	-	-	-	-	-	-	-	-	-	-	-	-	-	-	-	-	-	-	-	-	-	-	-	-	-	-	-	-	-	-	-	-
22	23 Beta-Alanine	C3H7NO2	[M+H]+	90.055	6	10.45	0.25	0	Beta-Alanine	0	-	-	-	-	-	-	-	-	-	-	-	-	-	-	-	-	-	-	-	-	-	-	-	-	-	-	-	-	-	-	-	-	-	-	-	-	-	-	-
25	26 Carbamoyl phosphate	CH4NO5P	[M-H]-	139.975	-6	27.46	0.48	0	Carbamoyl phosphate	0	-	-	-	-	-	-	-	-	-	-	-	-	-	-	-	-	-	-	-	-	-	-	-	-	-	-	-	-	-	-	-	-	-	-	-	-	-	-	-
27	28 CDP	C9H15N3O11P2	[M+H]+	404.026	-5.9	13.96	0.23	0	CDP	0	-	-	-	-	-	-	-	-	-	-	-	-	-	-	-	-	-	-	-	-	-	-	-	-	-	-	-	-	-	-	-	-	-	-	-	-	-	-	-
37	38 Cytidine triphosphate	C9H16N3O14P3	[M-H]-	481.977	-10.3	19.21	0.24	0	Cytidine triphosphate	0	-	-	-	-	-	-	-	-	-	-	-	-	-	-	-	-	-	-	-	-	-	-	-	-	-	-	-	-	-	-	-	-	-	-	-	-	-	-	-
38	39 Cytosine	C4H5N3O	[M+H]+	112.05	3.2	9.21	0.45	0	Cytosine	0	-	-	-	-	-	-	-	-	-	-	-	-	-	-	-	-	-	-	-	-	-	-	-	-	-	-	-	-	-	-	-	-	-	-	-	-	-	-	-
41	42 D-Glyceraldehyde 3-phosphate	C3H7O6P	[M-H]-	168.991	-2.1	13.1	0.29	0	D-Glyceraldehyde 3-phosphate	0	-	-	-	-	-	-	-	-	-	-	-	-	-	-	-	-	-	-	-	-	-	-	-	-	-	-	-	-	-	-	-	-	-	-	-	-	-	-	-
42	43 Dihydrofolic acid	C19H21N7O6	[M+H]+	444.163	14.6	13.83	0	0	Dihydrofolic acid	0	-	-	-	-	-	-	-	-	-	-	-	-	-	-	-	-	-	-	-	-	-	-	-	-	-	-	-	-	-	-	-	-	-	-	-	-	-	-	-
46	47 dTDP	C10H16N2O11P2	[M-H]-	401.016	1.3	12.17	0.23	0	dTDP	0	-	-	-	-	-	-	-	-	-	-	-	-	-	-	-	-	-	-	-	-	-	-	-	-	-	-	-	-	-	-	-	-	-	-	-	-	-	-	-
48	49 Folic acid	C19H19N7O6	[M+H]+	442.147	-7.6	14.04	0.05	0	Folic acid	0	-	-	-	-	-	-	-	-	-	-	-	-	-	-	-	-	-	-	-	-	-	-	-	-	-	-	-	-	-	-	-	-	-	-	-	-	-	-	-
49	50 Fructose 1,6-bisphosphate	C6H14O12P2	[M-H]-	338.989	-4.1	16.07	0.27	0	Fructose 1,6-bisphosphate	0	-	-	-	-	-	-	-	-	-	-	-	-	-	-	-	-	-	-	-	-	-	-	-	-	-	-	-	-	-	-	-	-	-	-	-	-	-	-	-
59	60 Guanosine diphosphate	C10H15N5O11P2	[M-H]-	442.017	-2.8	15.22	0.28	0	Guanosine diphosphate	0	-	-	-	-	-	-	-	-	-	-	-	-	-	-	-	-	-	-	-	-	-	-	-	-	-	-	-	-	-	-	-	-	-	-	-	-	-	-	-
61	62 Guanosine triphosphate	C10H16N5O14P3	[M-H]-	521.983	-9.2	16.8	0.18	0	Guanosine triphosphate	0	-	-	-	-	-	-	-	-	-	-	-	-	-	-	-	-	-	-	-	-	-	-	-	-	-	-	-	-	-	-	-	-	-	-	-	-	-	-	-
62	63 Homocysteine	C4H9NO2S	[M-H]-	134.028	-9.1	8.63	0.3	0	Homocysteine	0	-	-	-	-	-	-	-	-	-	-	-	-	-	-	-	-	-	-	-	-	-	-	-	-	-	-	-	-	-	-	-	-	-	-	-	-	-	-	-
74	75 L-Cysteine	C3H7NO2S	[M+H]+	122.027	2.2	14.5	0.48	0	L-Cysteine	0	-	-	-	-	-	-	-	-	-	-	-	-	-	-	-	-	-	-	-	-	-	-	-	-	-	-	-	-	-	-	-	-	-	-	-	-	-	-	-
98	99 N-Acetyl-L-phenylalanine	C11H13NO3	[M+H]+	208.097	0.4	3.57	0.15	0	N-Acetyl-L-phenylalanine	0	-	-	-	-	-	-	-	-	-	-	-	-	-	-	-	-	-	-	-	-	-	-	-	-	-	-	-	-	-	-	-	-	-	-	-	-	-	-	-
94	95 N-Acetylglutamic acid	C7H11NO5	[M+H]+	190.071	0	10.55	0.33	0	N-Acetylglutamic acid	0	-	-	-	-	-	-	-	-	-	-	-	-	-	-	-	-	-	-	-	-	-	-	-	-	-	-	-	-	-	-	-	-	-	-	-	-	-	-	-
102	103 NADH	C21H29N7O14P2	[M-H]-	664.117	-14.3	11.14	0	0	NADH	0	-	-	-	-	-	-	-	-	-	-	-	-	-	-	-	-	-	-	-	-	-	-	-	-	-	-	-	-	-	-	-	-	-	-	-	-	-	-	-
104	105 NADPH	C21H30N7O17P3	[M-H]-	744.084	5.3	13.52	0	0	NADPH	0	-	-	-	-	-	-	-	-	-	-	-	-	-	-	-	-	-	-	-	-	-	-	-	-	-	-	-	-	-	-	-	-	-	-	-	-	-	-	-
110	111 Orotidylic acid	C10H13N2O11P	[M+H]+	369.033	-10.8	11.24	0.22	0	Orotidylic acid	0	-	-	-	-	-	-	-	-	-	-	-	-	-	-	-	-	-	-	-	-	-	-	-	-	-	-	-	-	-	-	-	-	-	-	-	-	-	-	-
116	117 Phenol	C6H6O	[M-H]-	93.0346	-14.9	3.48	0.05	0	Phenol	0	-	-	-	-	-	-	-	-	-	-	-	-	-	-	-	-	-	-	-	-	-	-	-	-	-	-	-	-	-	-	-	-	-	-	-	-	-	-	-
119	120 Phosphoribosyl pyrophosphate	C5H13O14P3	[M-H]-	388.945	-9.9	16.18	0	0	Phosphoribosyl pyrophosphate	0	-	-	-	-	-	-	-	-	-	-	-	-	-	-	-	-	-	-	-	-	-	-	-	-	-	-	-	-	-	-	-	-	-	-	-	-	-	-	-
142	143 Uridine triphosphate	C9H15N2O15P3	[M-H]-	482.961	4	15.16	0.23	0	Uridine triphosphate	0	-	-	-	-	-	-	-	-	-	-	-	-	-	-	-	-	-	-	-	-	-	-	-	-	-	-	-	-	-	-	-	-	-	-	-	-	-	-	-
[truncated: 99 more columns]

## Sheet: IDs
Query	Match	HMDB	PubChem	ChEBI	KEGG	METLIN	SMILES	Comment
4-Hydroxyproline	4-Hydroxyproline	HMDB0000725	5810	18095	C01157	257	O[C@H]1CN[C@@H](C1)C(O)=O	1
4,5-Dihydroorotic acid	4,5-Dihydroorotic acid	HMDB0000528	648	30865	C00337	5513	OC(=O)C1CC(=O)NC(=O)N1	1
5'-Methylthioadenosine	5'-Methylthioadenosine	HMDB0001173	439176	17509	C00170	3425	CSC[C@H]1O[C@H]([C@H](O)[C@@H]1O)N1C=NC2=C1N=CN=C2N	1
Adenine	Adenine	HMDB0000034	190	16708	C00147	85	NC1=C2NC=NC2=NC=N1	1
Adenosine monophosphate	Adenosine monophosphate	HMDB0000045	6083	16027	C00020	5111	NC1=C2N=CN([C@@H]3O[C@H](COP(O)(O)=O)[C@@H](O)[C@H]3O)C2=NC=N1	1
Allantoin	Allantoin	HMDB0000462	204	15676	C01551	89	NC(=O)NC1NC(=O)NC1=O	1
Aminoadipic acid	Aminoadipic acid	HMDB0000510	469	37024	C00956	5496	NC(CCCC(=O)O)C(=O)O	1
Betaine	Betaine	HMDB0000043	247	17750	C00719	287	C[N+](C)(C)CC([O-])=O	1
Butyrylcarnitine	Butyrylcarnitine	HMDB0002013	439829	NA	C02862	6436	CCCC(=O)OC(CC(=O)[O-])C[N+](C)(C)C	1
Choline	Choline	HMDB0000097	305	15354	C00114	56	C[N+](C)(C)CCO	1
Citrulline	Citrulline	HMDB0000904	9750	16349	C00327	16	N[C@@H](CCCNC(N)=O)C(O)=O	1
Cytidine	Cytidine	HMDB0000089	6253	17562	C00475	3376	NC1=NC(=O)N(C=C1)[C@@H]1O[C@H](CO)[C@@H](O)[C@H]1O	1
D-2-Hydroxyglutaric acid	D-2-Hydroxyglutaric acid	HMDB0000606	439391	32796	C01087	5581	O[C@H](CCC(O)=O)C(O)=O	1
D-Glucose	D-Glucose	HMDB0000122	5793	4167	C00221	133	OC[C@H]1O[C@@H](O)[C@H](O)[C@@H](O)[C@@H]1O	1
Glycine	Glycine	HMDB0000123	750	15428	C00037	20	NCC(O)=O	1
Guanine	Guanine	HMDB0000132	764	16235	C00242	315	NC1=NC(=O)C2=C(N1)N=CN2	1
Guanosine	Guanosine	HMDB0000133	6802	16750	C00387	87	NC1=NC2=C(N=CN2[C@@H]2O[C@H](CO)[C@@H](O)[C@H]2O)C(=O)N1	1
Hypotaurine	Hypotaurine	HMDB0000965	107812	16668	C00519	281	NCCS(O)=O	1
Hypoxanthine	Hypoxanthine	HMDB0000157	790	17368	C00262	83	OC1=NC=NC2=C1NC=N2	1
Inosine	Inosine	HMDB0000195	6021	17596	C00294	84	OC[C@H]1O[C@H]([C@H](O)[C@@H]1O)N1C=NC2=C(O)N=CN=C12	1
L-Acetylcarnitine	L-Acetylcarnitine	HMDB0000201	7045767	NA	C02571	5213	CC(=O)OC(CC(=O)[O-])C[N+](C)(C)C	1
L-Alanine	L-Alanine	HMDB0000161	5950	16977	C00041	NA	C[C@H](N)C(O)=O	1
L-Aspartic acid	L-Aspartic acid	HMDB0000191	5960	17053	C00049	5206	N[C@@H](CC(O)=O)C(O)=O	1
L-Carnitine	L-Carnitine	HMDB0000062	10917	16347	C00318	52	C[N+](C)(C)C[C@H](O)CC([O-])=O	1
L-Cystathionine	L-Cystathionine	HMDB0000099	439258	17482	C02291	39	N[C@@H](CCSC[C@H](N)C(O)=O)C(O)=O	1
L-Glutamic acid	L-Glutamic acid	HMDB0000148	33032	16015	C00025	5174	N[C@@H](CCC(O)=O)C(O)=O	1
L-Glutamine	L-Glutamine	HMDB0000641	5961	18050	C00064	5614	N[C@@H](CCC(N)=O)C(O)=O	1
L-Histidine	L-Histidine	HMDB0000177	6274	15971	C00135	21	N[C@@H](CC1=CN=CN1)C(O)=O	1
L-Isoleucine	L-Isoleucine	HMDB0000172	6306	17191	C00407	5193	CC[C@H](C)[C@@H](C(=O)O)N	1
L-Kynurenine	L-Kynurenine	HMDB0000684	161166	16946	C00328	72	N[C@@H](CC(=O)C1=CC=CC=C1N)C(O)=O	1
L-Leucine	L-Leucine	HMDB0000687	6106	15603	C00123	24	CC(C)C[C@H](N)C(O)=O	1
L-Methionine	L-Methionine	HMDB0000696	6137	16643	C00073	5664	CSCC[C@H](N)C(O)=O	1
L-Phenylalanine	L-Phenylalanine	HMDB0000159	6140	17295	C00079	28	N[C@@H](CC1=CC=CC=C1)C(O)=O	1
L-Proline	L-Proline	HMDB0000162	145742	17203	C00148	29	OC(=O)[C@@H]1CCCN1	1
L-Serine	L-Serine	HMDB0000187	5951	17115	C00065	5203	N[C@@H](CO)C(O)=O	1
L-Threonine	L-Threonine	HMDB0000167	6288	16857	C00188	32	C[C@@H](O)[C@H](N)C(O)=O	1
L-Tryptophan	L-Tryptophan	HMDB0000929	6305	16828	C00078	5879	N[C@@H](CC1=CNC2=C1C=CC=C2)C(O)=O	1
L-Tyrosine	L-Tyrosine	HMDB0000158	6057	17895	C00082	34	N[C@@H](CC1=CC=C(O)C=C1)C(O)=O	1
L-Valine	L-Valine	HMDB0000883	6287	16414	C00183	5842	CC(C)[C@H](N)C(O)=O	1
N-Acetyl-L-alanine	N-Acetyl-L-alanine	HMDB0000766	88064	40992	NA	5733	C[C@H](NC(C)=O)C(O)=O	1
N-Acetylornithine	N-Acetylornithine	HMDB0003357	439232	16543	C00437	NA	CC(=O)N[C@@H](CCCN)C(O)=O	1
N-Acetylserine	N-Acetylserine	HMDB0002931	65249	45441	NA	308	CC(=O)N[C@@H](CO)C(O)=O	1
Nicotinic acid	Nicotinic acid	HMDB0001488	938	15940	C00253	6272	OC(=O)C1=CN=CC=C1	1
Orotic acid	Orotic acid	HMDB0000226	967	16742	C00295	318	OC(=O)C1=CC(=O)NC(=O)N1	1
Pantothenic acid	Pantothenic acid	HMDB0000210	6613	46905	C00864	NA	CC(C)(CO)[C@@H](O)C(=O)NCCC(O)=O	1
Pipecolic acid	Pipecolic acid	HMDB0000070	849	17964	C00408	50	OC(=O)C1CCCCN1	1
Propionylcarnitine	Propionylcarnitine	HMDB0000824	107738	28867	C03017	5787	CCC(=O)OC(CC(=O)[O-])C[N+](C)(C)C	1
Saccharopine	Saccharopine	HMDB0000279	160556	16927	C00449	383	N[C@@H](CCCCN[C@@H](CCC(O)=O)C(O)=O)C(O)=O	1
Sarcosine	Sarcosine	HMDB0000271	1088	15611	C00213	51	CNCC(O)=O	1
Uracil	Uracil	HMDB0000300	1174	17568	C00106	258	O=C1NC=CC(=O)N1	1
Uric acid	Uric acid	HMDB0000289	1175	17775	C00366	88	O=C1NC2=C(N1)C(=O)NC(=O)N2	1
Uridine	Uridine	HMDB0000296	6029	16704	C00299	90	OC[C@H]1O[C@H]([C@H](O)[C@@H]1O)N1C=CC(=O)NC1=O	1
Uridine 5'-monophosphate	Uridine 5'-monophosphate	HMDB0000288	6030	16695	C00105	NA	O[C@H]1[C@@H](O)[C@@H](O[C@@H]1COP(O)(O)=O)N1C=CC(=O)NC1=O	1
Uridine diphosphate glucose	Uridine diphosphate glucose	HMDB0000286	8629	46229	C00029	5278	OC[C@H]1O[C@H](OP(O)(=O)OP(O)(=O)OC[C@H]2O[C@H]([C@H](O)[C@@H]2O)N2C=CC(=O)NC2=O)[C@H](O)[C@@H](O)[C@@H]1O	1
Valerylcarnitine	Valerylcarnitine	HMDB0013128	53481619	NA	NA	NA	CCCCC(=O)O[C@@H](CC(=O)[O-])C[N+](C)(C)C	1
Xanthine	Xanthine	HMDB0000292	1188	17712	C00385	82	O=C1NC2=C(NC=N2)C(=O)N1	1
Adenosine	Adenosine	HMDB0000050	60961	16335	C00212	86	NC1=C2N=CN([C@@H]3O[C@H](CO)[C@@H](O)[C@H]3O)C2=NC=N1	1
Dihydroxyacetone phosphate	Dihydroxyacetone phosphate	HMDB0001473	668	16108	C00111	6262	OCC(=O)COP(O)(O)=O	1
Fructose 6-phosphate	Fructose 6-phosphate	HMDB0000124	69507	15946	C00085	5159	OCC(=O)[C@@H](O)[C@H](O)[C@H](O)COP(O)(O)=O	1
Fumaric acid	Fumaric acid	HMDB0000134	444972	18012	C00122	3242	OC(=O)\C=C\C(O)=O	1
N-Acetyl-L-methionine	N-Acetylmethionine	HMDB0011745	6180	21557	C02712	NA	CSCC[C@H](NC(C)=O)C(O)=O	1
N-Acetylglutamine	N-Acetylglutamine	HMDB0006029	182230	21553	NA	NA	CC(=O)N[C@@H](CCC(N)=O)C(O)=O	1
Oxoglutaric acid	Oxoglutaric acid	HMDB0000208	51	30915	C00026	5218	OC(=O)CCC(=O)C(O)=O	1
Phosphorylcholine	Phosphorylcholine	HMDB0001565	1014	18132	C00588	6326	C[N+](C)(C)CCOP(O)(O)=O	1
S-Adenosylmethionine	S-Adenosylmethionine	HMDB0001185	34756	15414	C00019	6064	C[S+](CC[C@H](N)C(O)=O)C[C@H]1O[C@H]([C@H](O)[C@@H]1O)N1C=NC2=C1N=CN=C2N	1
Succinic acid	Succinic acid	HMDB0000254	1110	15741	C00042	114	O=C(O)CCC(=O)O	1
Uridine 5'-diphosphate	Uridine 5'-diphosphate	HMDB0000295	6031	17659	C00015	NA	O[C@H]1[C@@H](O)[C@@H](O[C@@H]1COP(O)(=O)OP(O)(O)=O)N1C=CC(=O)NC1=O	1
Uridine diphosphate-N-acetylglucosamine	Uridine diphosphate-N-acetylglucosamine	HMDB0000290	445675	16264	C00043	5281	CC(=O)N[C@@H]1[C@@H](O)[C@H](O)[C@@H](CO)O[C@@H]1OP(O)(=O)OP(O)(=O)OC[C@H]1O[C@H]([C@H](O)[C@@H]1O)N1C=CC(=O)NC1=O	1
Glucose 6-phosphate	Glucose 6-phosphate	HMDB0001401	5958	4170	C00092	145	OC1O[C@H](COP(O)(O)=O)[C@@H](O)[C@H](O)[C@H]1O	1
Glycerol 3-phosphate	Glycerol 3-phosphate	HMDB0000126	439162	15978	C00093	5161	C([C@H](COP(=O)(O)O)O)O	1
L-Lactic acid	L-Lactic acid	HMDB0000190	107689	422	C00186	5205	C[C@H](O)C(O)=O	1
L-Malic acid	L-Malic acid	HMDB0000156	222656	30797	C00149	NA	O[C@@H](CC(O)=O)C(O)=O	1
Cytidine monophosphate	Cytidine monophosphate	HMDB0000095	6131	17361	C00055	5143	NC1=NC(=O)N(C=C1)[C@@H]1O[C@H](COP(O)(O)=O)[C@@H](O)[C@H]1O	1
Guanosine monophosphate	Guanosine monophosphate	HMDB0001397	6804	17345	C00144	6216	NC1=NC2=C(N=CN2[C@@H]2O[C@H](COP(O)(O)=O)[C@@H](O)[C@H]2O)C(=O)N1	1
S-Adenosylhomocysteine	S-Adenosylhomocysteine	HMDB0000939	439155	16680	C00021	296	N[C@@H](CCSC[C@H]1O[C@H]([C@H](O)[C@@H]1O)N1C=NC2=C1N=CN=C2N)C(O)=O	1
Taurine	Taurine	HMDB0000251	1123	15891	C00245	31	NCCS(O)(=O)=O	1
Ureidosuccinic acid	Ureidosuccinic acid	HMDB0000828	93072	15859	C00438	5791	NC(=O)N[C@@H](CC(O)=O)C(O)=O	1
cis-Aconitic acid	cis-Aconitic acid	HMDB0000072	643757	32805	C00417	5130	OC(=O)C\C(=C\C(O)=O)C(O)=O	1
Palmitic acid	Palmitic acid	HMDB0000220	985	15756	C00249	187	CCCCCCCCCCCCCCCC(=O)O	1
L-Asparagine	L-Asparagine	HMDB0000168	6267	17196	C00152	14	N[C@@H](CC(N)=O)C(O)=O	1
Pyruvic acid	Pyruvic acid	HMDB0000243	1060	32816	C00022	117	CC(=O)C(=O)O	1
Ureidopropionic acid	Ureidopropionic acid	HMDB0000026	111	18261	C02642	5097	NC(=O)NCCC(O)=O	1
D-Sedoheptulose 7-phosphate	D-Sedoheptulose 7-phosphate	HMDB0001068	92042786	133983	C05382	5980	OC[C@]1(O)O[C@H](COP(O)(O)=O)[C@@H](O)[C@@H](O)[C@@H]1O	1
Glutathione	Glutathione	HMDB0062697	745	57925	C00051	NA	NC(CCC(O)=NC(CS)C(O)=NCC(O)=O)C(O)=O	1
L-Cystine	L-Cystine	HMDB0000192	67678	16283	C00491	5207	N[C@@H](CSSC[C@H](N)C(O)=O)C(O)=O	1
Ornithine	Ornithine	HMDB0000214	6262	15729	C00077	27	NCCC[C@H](N)C(O)=O	1
Oxidized glutathione	Oxidized glutathione	HMDB0003337	65359	17858	C00127	6893	N[C@@H](CCC(=O)N[C@@H](CSSC[C@H](NC(=O)CC[C@H](N)C(O)=O)C(=O)NCC(O)=O)C(=O)NCC(O)=O)C(O)=O	1
FAD	FAD	HMDB0001248	643975	16238	C00016	6106	CC1=CC2=C(C=C1C)N(C[C@H](O)[C@H](O)[C@H](O)COP(O)(=O)OP(O)(=O)OC[C@H]1O[C@H]([C@H](O)[C@@H]1O)N1C=NC3=C1N=CN=C3N)C1=NC(=O)NC(=O)C1=N2	1
Inosinic acid	Inosinic acid	HMDB0000175	8582	17202	C00130	5196	O[C@@H]1[C@@H](COP(O)(O)=O)O[C@H]([C@@H]1O)N1C=NC2=C1N=CNC2=O	1
NAD	NADH	HMDB0000902	5893	44215	C00003	5858	NC(=O)C1=C[N+](=CC=C1)[C@@H]1O[C@H](COP([O-])(=O)OP(O)(=O)OC[C@H]2O[C@H]([C@H](O)[C@@H]2O)N2C=NC3=C2N=CN=C3N)[C@@H](O)[C@H]1O	1
O-Phosphoethanolamine	O-Phosphoethanolamine	HMDB0000224	1015	17553	C00346	5233	NCCOP(O)(O)=O	1
L-Lysine	L-Lysine	HMDB0000182	5962	18019	C00047	5200	NCCCC[C@H](N)C(O)=O	1
Citric acid	Citric acid	HMDB0000094	311	30769	C00158	124	OC(=O)CC(O)(CC(O)=O)C(O)=O	1
Phosphoserine	Phosphoserine	HMDB0000272	68841	15811	C01005	5270	N[C@@H](COP(O)(O)=O)C(O)=O	1
Acetoacetic acid	Acetoacetic acid	HMDB0000060	96	15344	C00164	276	CC(=O)CC(=O)O	1
Creatinine	Creatinine	HMDB0000562	588	16737	C00791	8	CN1CC(=O)NC1=N	1
Cyclic AMP	Cyclic AMP	HMDB0000058	6076	17489	C00575	5120	[H][C@@]12COP(O)(=O)O[C@@]1([H])[C@@H](O)[C@@H](O2)N1C=NC2=C1N=CN=C2N	1
Guanidoacetic acid	Guanidoacetic acid	HMDB0000128	763	16344	C00581	5163	NC(=N)NCC(O)=O	1
ADP	ADP	HMDB0001341	6022	16761	C00008	6175	NC1=NC=NC2=C1N=CN2[C@@H]1O[C@H](COP(O)(=O)OP(O)(O)=O)[C@@H](O)[C@H]1O	1
Phosphoenolpyruvic acid	Phosphoenolpyruvic acid	HMDB0000263	1005	44897	C00074	5264	OC(=O)C(=C)OP(O)(O)=O	1
Thymidine	Thymidine	HMDB0000273	5789	17748	C00214	3375	CC1=CN([C@H]2C[C@H](O)[C@@H](CO)O2)C(=O)NC1=O	1
D-Ribose 5-phosphate	D-Ribose 5-phosphate	HMDB0001548	440101	52742	C00117	6315	O[C@H]1O[C@H](COP(O)(O)=O)[C@@H](O)[C@H]1O	1
Xanthylic acid	Xanthylic acid	HMDB0001554	73323	15652	C00655	NA	O[C@@H]1[C@@H](COP(O)(O)=O)O[C@H]([C@@H]1O)N1C=NC2=C1NC(=O)NC2=O	1
3-Phosphoglyceric acid	3-Phosphoglyceric acid	HMDB0000807	724	17050	C00597	150	OC(COP(O)(O)=O)C(O)=O	1
N6-Acetyl-L-lysine	N6-Acetyl-L-lysine	HMDB0000206	92832	17752	C02727	5216	CC(=O)NCCCC[C@H](N)C(O)=O	1
Xanthosine	Xanthosine	HMDB0000299	64959	18107	C01762	3408	OC[C@H]1O[C@H]([C@H](O)[C@@H]1O)N1C=NC2=C1N=C(O)N=C2O	1
Niacinamide	Niacinamide	HMDB0001406	936	17154	C00153	1497	NC(=O)C1=CC=CN=C1	1
Ribose 1-phosphate	Ribose 1-phosphate	HMDB0001489	439236	16300	C00620	6273	OC[C@H]1O[C@H](OP(O)(O)=O)[C@H](O)[C@@H]1O	1
Creatine	Creatine	HMDB0000064	586	16919	C00300	7	CN(CC(O)=O)C(N)=N	1
L-Arginine	L-Arginine	HMDB0000517	6322	16467	C00062	5502	N[C@@H](CCCNC(N)=N)C(O)=O	1
5-Phosphoribosylamine	5-Phosphoribosylamine	HMDB0001128	439905	37737	C03090	6023	N[C@@H]1O[C@H](COP(O)(O)=O)[C@@H](O)[C@H]1O	1
Acetyl-CoA	Acetyl-CoA	HMDB0001206	444493	15351	C00024	6082	CC(=O)SCCNC(=O)CCNC(=O)[C@@H](C(C)(C)COP(=O)(O)OP(=O)(O)OC[C@@H]1[C@H]([C@H]([C@@H](O1)N2C=NC3=C2N=CN=C3N)O)OP(=O)(O)O)O	1
Acetylcysteine	Acetylcysteine	HMDB0001890	12035	28939	C06809	784	CC(=O)N[C@@H](CS)C(O)=O	1
Carnosine	Carnosine	HMDB0000033	439224	15727	C00386	38	NCCC(=O)N[C@@H](CC1=CN=CN1)C(O)=O	1
NADP	NADPH	HMDB0000217	5886	44409	C00006	5227	NC(=O)C1=C[N+](=CC=C1)[C@@H]1O[C@H](COP([O-])(=O)OP(O)(=O)OC[C@H]2O[C@H]([C@H](OP(O)(O)=O)[C@@H]2O)N2C=NC3=C2N=CN=C3N)[C@@H](O)[C@H]1O	1
Oxoadipic acid	Oxoadipic acid	HMDB0000225	71	15753	C00322	5234	O=C(O)CCCC(=O)C(=O)O	1
Phosphocreatine	Phosphocreatine	HMDB0001511	587	17287	C02305	6288	CN(CC(O)=O)C(=N)NP(O)(O)=O	1
